- rane preserves spatial working memory in adult mice after moderate hypoxia. *Anesth Analg* 2006; 102:1134–8
44. McAuliffe JJ, Loepke AW, Miles L, Joseph B, Hughes E, Vorhees CV: Desflurane, isoflurane, and sevoflurane provide limited neuroprotection against neonatal hypoxia-ischemia in a delayed preconditioning paradigm. *ANESTHESIOLOGY* 2009; 111:533–46
  45. Matchett GA, Allard MW, Martin RD, Zhang JH: Neuroprotective effect of volatile anesthetic agents: Molecular mechanisms. *Neurol Res* 2009; 31:128–34
  46. Sleight JW, Andrzejowski J, Steyn-Ross A, Steyn-Ross M: The bispectral index: A measure of depth of sleep? *Anesth Analg* 1999; 88:659–61
  47. Cottrell JE: We care, therefore we are: Anesthesia-related morbidity and mortality: The 46th Rovenstine Lecture. *ANESTHESIOLOGY* 2008; 109:377–88
  48. Lenz C, Rebel A, van Ackern K, Kuschinsky W, Waschke KF: Local cerebral blood flow, local cerebral glucose utilization, and flow-metabolism coupling during sevoflurane *versus* isoflurane anesthesia in rats. *ANESTHESIOLOGY* 1998; 89:1480–8
  49. Heavner JE: Toxicity of anaesthetics. *Best Pract Res Clin Anaesthesiol* 2003; 17:1–3
  50. Culley DJ, Xie Z, Crosby G: General anesthetic-induced neurotoxicity: An emerging problem for the young and old? *Curr Opin Anaesthesiol* 2007; 20:408–13
  51. Perouansky M: Liaisons dangereuses? General anaesthetics and long-term toxicity in the CNS. *Eur J Anaesthesiol* 2007; 24:107–15
  52. Culley DJ, Baxter MG, Yukhananov R, Crosby G: Long-term impairment of acquisition of a spatial memory task following isoflurane-nitrous oxide anesthesia in rats. *ANESTHESIOLOGY* 2004; 100:309–14
  53. Asimiadou S, Bittigau P, Felderhoff-Mueser U, Manthey D, Siffringer M, Pesditschek S, Dzietko M, Kaindl AM, Pytel M, Studniarczyk D, Mozrzymas JW, Ikonomidou C: Protection with estradiol in developmental models of apoptotic neurodegeneration. *Ann Neurol* 2005; 58:266–76
  54. Simon W, Hapfelmeier G, Kochs E, Zieglgänsberger W, Rammes G: Isoflurane blocks synaptic plasticity in the mouse hippocampus. *ANESTHESIOLOGY* 2001; 94:1058–65

## ANESTHESIOLOGY REFLECTIONS

### Hall's Engraving of Morton Etherizing Frost

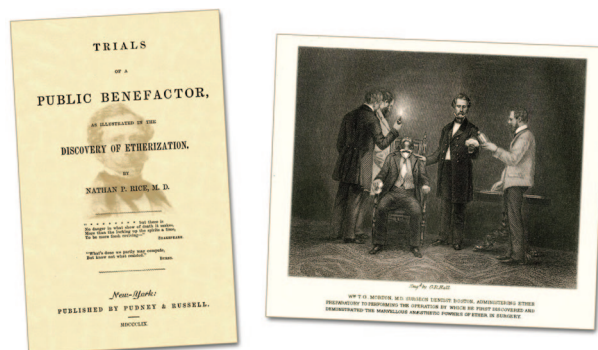

The title page (*above left*) of the 1890 edition of *Trials of a Public Benefactor*, introduces readers to Dr. Nathan P. Rice's efforts to credit dentist William T. G. Morton as the world's first surgical etherizer. The book features G. R. Hall's classic engraving (*above right*) with a caption reading "Wm T. G. Morton, M.D. Surgeon Dentist, Boston, administering ether preparatory to performing the operation by which he first discovered and demonstrated the marvellous [*sic*] anaesthetic powers of ether in surgery." That caption is not exactly accurate. Indeed, Morton's etherization of the seated merchant, Eben Frost, for dental extraction occurred on September 30, 1846, 6 yr before Morton, a medical school dropout, received his honorary M.D. from the Washington University of Baltimore, Maryland. (Copyright © the American Society of Anesthesiologists, Inc. This image appears in color in the *Anesthesiology Reflections* online collection available at [www.anesthesiology.org](http://www.anesthesiology.org).)

George S. Bause, M.D., M.P.H., Honorary Curator, ASA's Wood Library-Museum of Anesthesiology, Park Ridge, Illinois, and Clinical Associate Professor, Case Western Reserve University, Cleveland, Ohio. [UJYC@aol.com](mailto:UJYC@aol.com).
